# Supplementary material for: Validation of caprine H11 and Rosa26 safe harbor loci via CRISPR- based system: Investigations on stable transgene expression and genetic biosafety
Source: Research Square preprint supplement (doi:10.21203/rs.3.rs-6618888/v1), 2025-05-28
Supplement: Supplementary file 1 [file d00c05d85021fc5a6f1d987a.docx]

| Gene | Primer Name | Sequence | Length |
| --- | --- | --- | --- |
| Rosa26 | qR26-F | CAGATACCGGCCAGACGAC | 144 |
| qR26-R | CGGGGCCACCTAGAGAAGA |
| EGFP | qEGFP-F | AGATCCGCCACAACATCGAG | 206 |
| qEGFP-R | GTCCATGCCGAGAGTGATCC |
| DRG1 | qDRG1-F | GCTCGGACTCAGAAGAACA | 182 |
| qDRG1-R | CCCACAGACGGAAAACC |
| EIF4ENIF1 | qEIF4ENIF1-F | ACGAACAGCCTCTGTGAAGG | 196 |
| qEIF4ENIF1-R | AGCCAAGCATGGCACCTTAT |
| SETD5 | qSETD5-F | CTGGAGTACCGCAAACG | 201 |
| qSETD5-R | GGAATGAGACGGGGAGA |
| THUMPD3 | qTHUMPD3-F | ACGAAAATCCAACCATCA | 228 |
| qTHUMPD3-R | TCATATCAGCCTTCCACTTA |
| GAPDH | qGAPDH-F | GGTCGGAGTGAACGGAT | 174 |
| qGAPDH-R | TCTGCCTTGACTGTGCC |

Table S1 RT-qPCR Primer

Table S2 sgRNA sequences of H11 and Rosa26 sites

| Name | Sequence | PAM |
| --- | --- | --- |
| gRNA-H11-1 | CGGGGTGCAGCCTATTAACC | TGG |
| gRNA-H11-2 | GTGGGCAGCTCCAGGTTAAT | AGG |
| gRNA-R26-1 | GTCGAGTCTCTCCTCGATTA | TGG |
| gRNA-R26-2 | GAGGCGATGACGAGATCGCG | GGG |

Table S3 Transfection conditions

| Voltage | Time | Consumption |
| --- | --- | --- |
| 175V | 7.5ms | 20.0μg |
| 200V | 5.0ms | 20.0μg |
| 225V | 5.0ms | 20.0μg |
| 250V | 2.5ms | 20.0μg |

Table S4 PCR Primer

| Gene | Primer Name | Sequence | | Length |
| --- | --- | --- | --- | --- |
|  | H11-sg1-Edit-F | CCCCTGTTGCTTGAGACTGT | 745 | |
|  | H11-sg1-Edit-R | TTTGTCATGTTTACTGGGGCAA |
|  | H11-sg2-Edit-F | TCCCCACTTTACACCCTGGA | 517 | |
|  | H11-sg2-Edit-R | TCAGCCAGTCTCTCAGCTCT |
|  | R26-sg1-Edit-F | ACGCAGTCTCGCTGCATAAA | 749 | |
|  | R26-sg1-Edit-R | GGGAACGGCCCCTTGTTATT |
|  | R26-sg2-Edit-F | GACAAGACTAGCCCGACCTG | 689 | |
|  | R26-sg2-Edit-R | TCTGTTTTGGCGGTGTAGCA |
|  | H11-L-arm-F | GAGACATGTAGACCTGGCTGTACTTCCCC | 993 | |
|  | H11-L-arm-R | GCTGGATTAATGGTCGCTTTTCAACAAAACCTG |
|  | H11-R-arm-F | GCAACGCGTAGAGCTGAGAGACTGGCTGA | 1158 | |
|  | H11-R-arm-R | GCAACGCGTGAGTACCGACAGTGAGCAGG |
|  | R26-L-arm-F | GAACATGTGACGGGAGCATAGCGTTTGT | 854 | |
|  | R26-L-arm-R | TGTGTTATTAATCTCGCGCCGATTTTTGGAGA |
|  | R26-R-arm-F | CCCTCACGCGTCCCAATTTCTTTATCTTCCC | 916 | |
|  | R26-R-arm-R | CCTACGCGTTCCTGTCAGTAGTTACCACCC |
|  | H11-KI-F | TCCCCACTTTACACCCTGGA | 712/2157 | |
|  | H11-KI-R | CCTCAAGACTCTGGTGCCTG |
|  | R26-KI-F | TCTGTTTTGGCGGTGTAGCA | 700/2056 | |
|  | R26-KI-R | GCTGCCTGAAGGACAAGACT |

**图S1.山羊H11位点及Rosa26基因的基因组结构与同源性分析**

**A.**H11位点的基因组定位示意图（蓝色椭圆虚线标注）
**B.**山羊H11位点及侧翼序列的生物信息学预测
**C.**H11基因及其侧翼序列的同源性比对
**D.**多物种Rosa26基因的基因组定位（Ensembl数据库，红色箭头指示）
**E.**基于Ensembl数据库的山羊基因组与小鼠Rosa26启动子及外显子1的比对
**F.**基于NCBI数据库的山羊基因组与小鼠Rosa26启动子及外显子1的比对
**G.**绵羊与山羊Rosa26基因序列的比对分析
**H.**多物种间Rosa26第一外显子的同源性比较


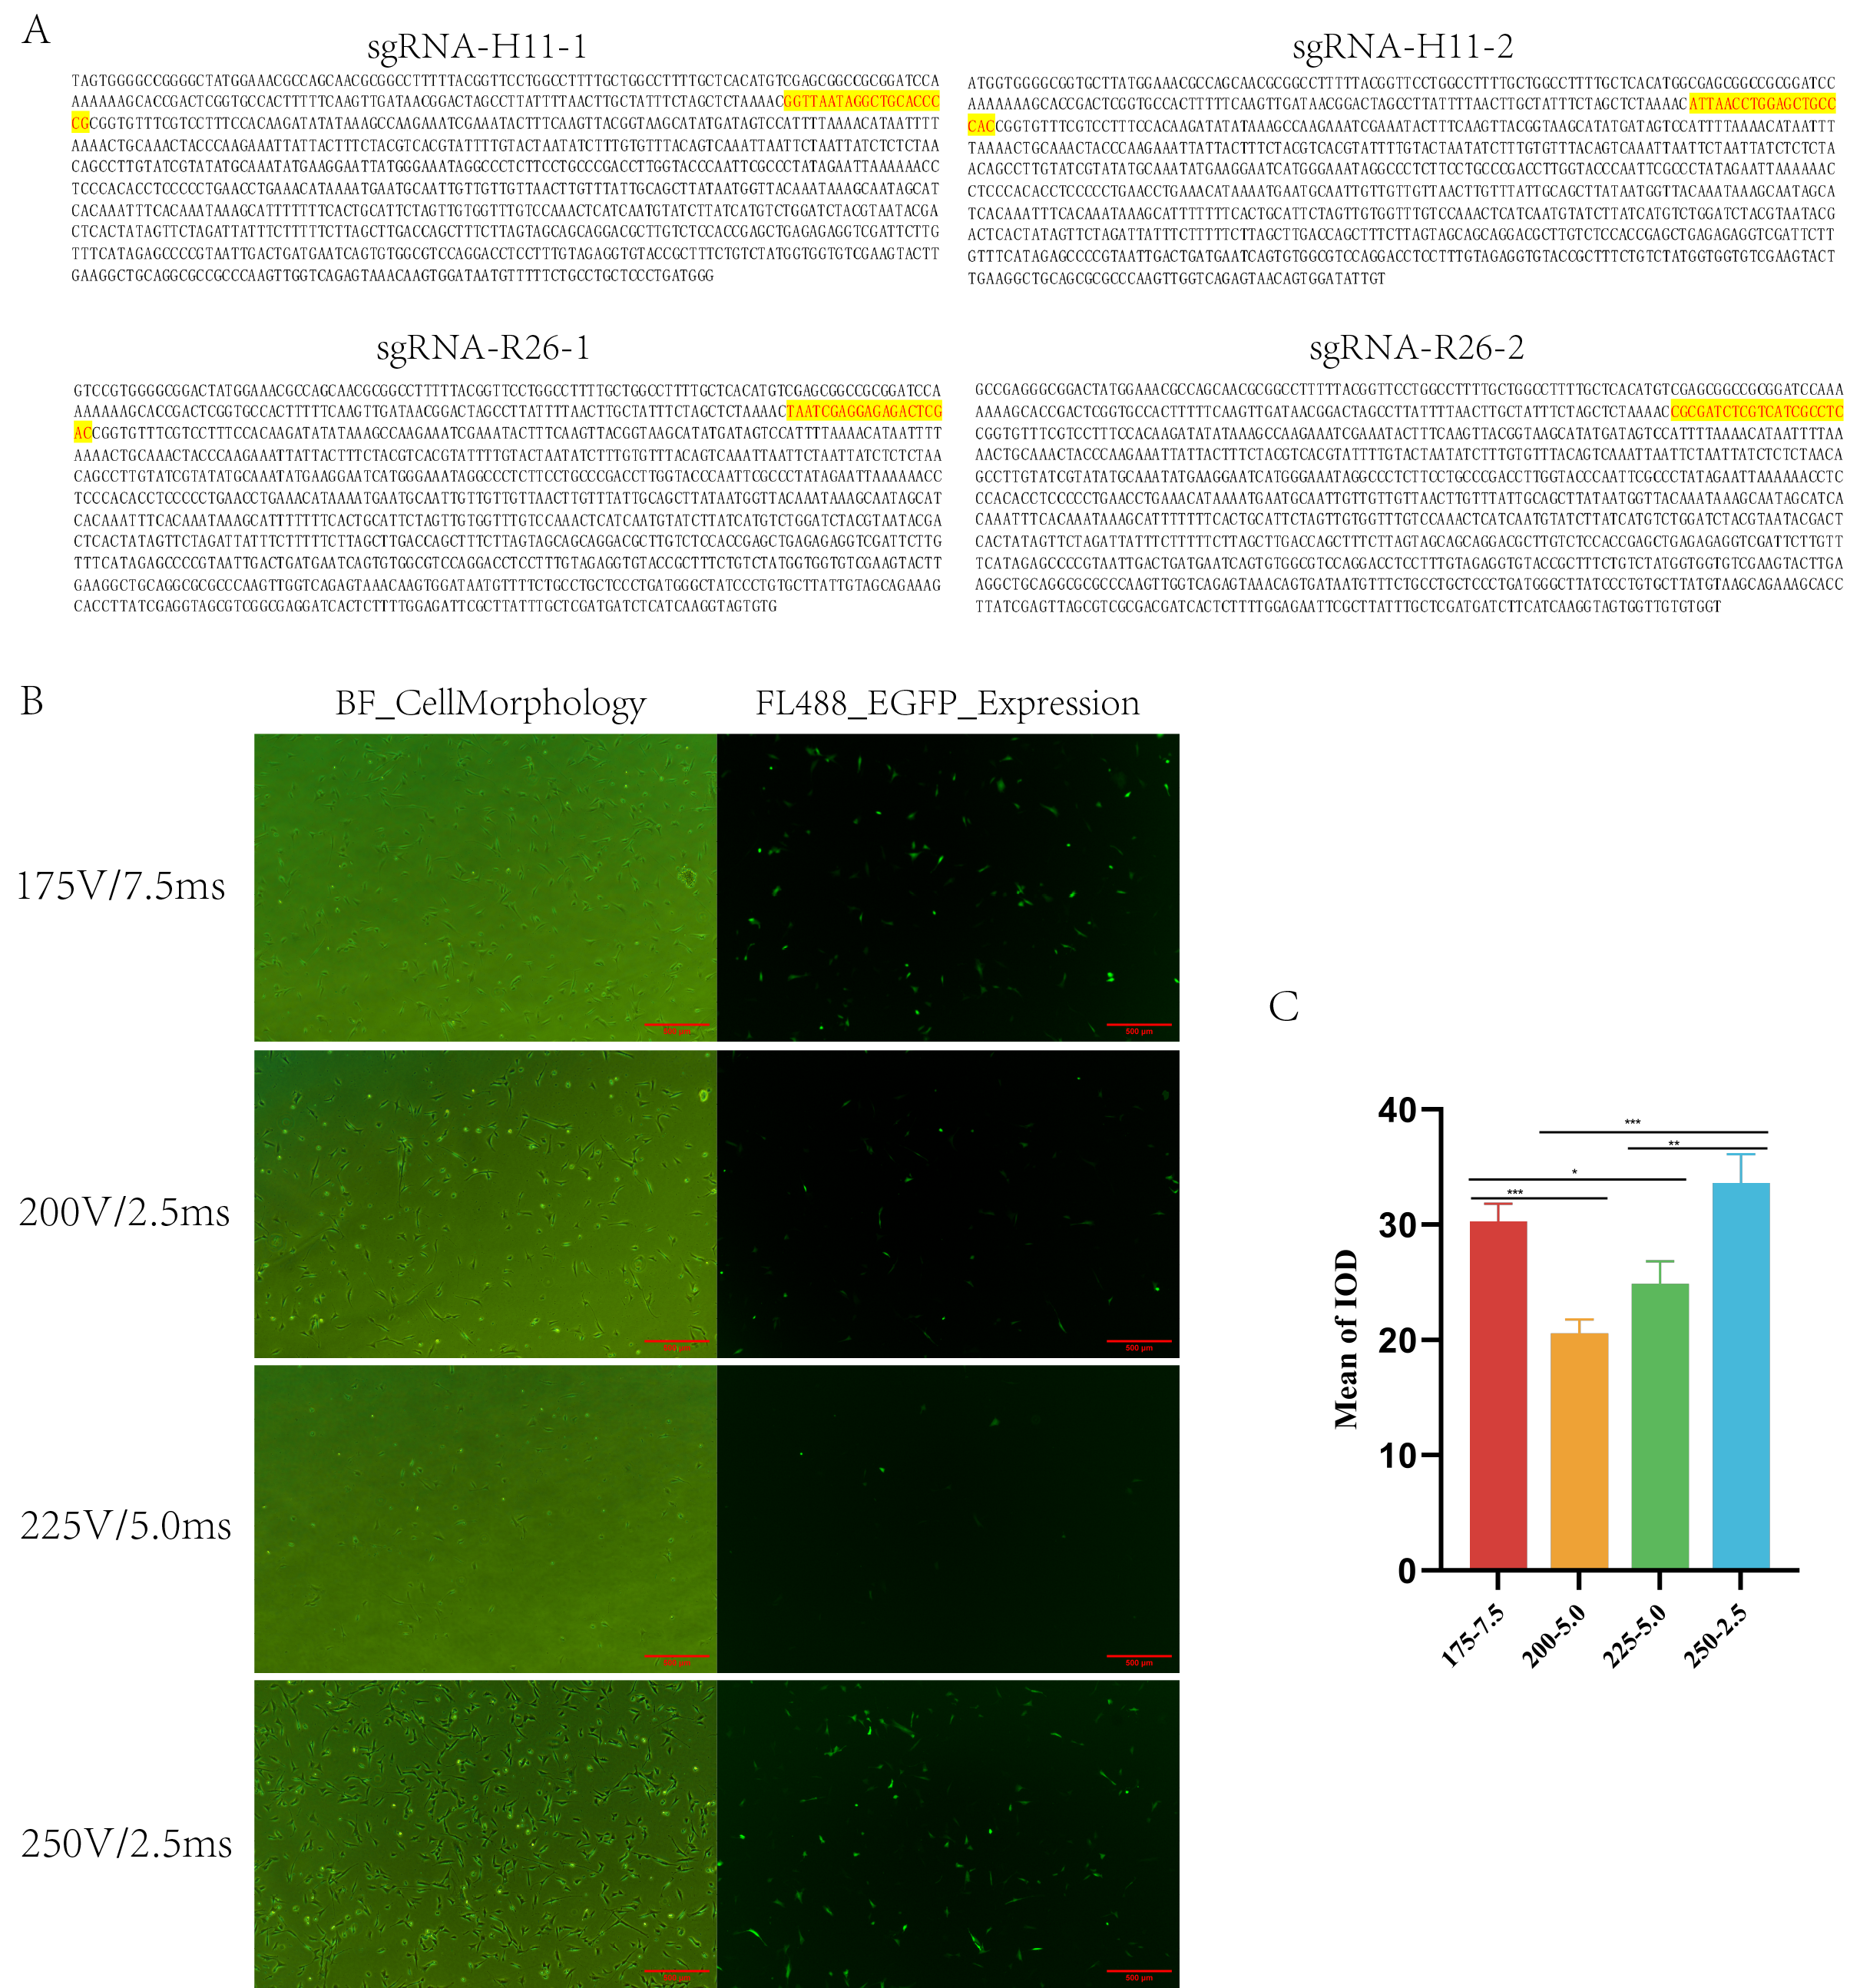


图S2.基因编辑系统构建与电转染条件优化

A.sgRNA靶序列测序验证（黄色高亮为sgRNA互补区，下划线为PAM序列）

B.细胞电穿孔条件筛选（电压与脉冲时长对转染效率的影响），比例尺=100μm

C.EGFP荧光强度半定量分析，误差线代表平均值±SD。* *p* < 0.05；** *p* < 0.01。


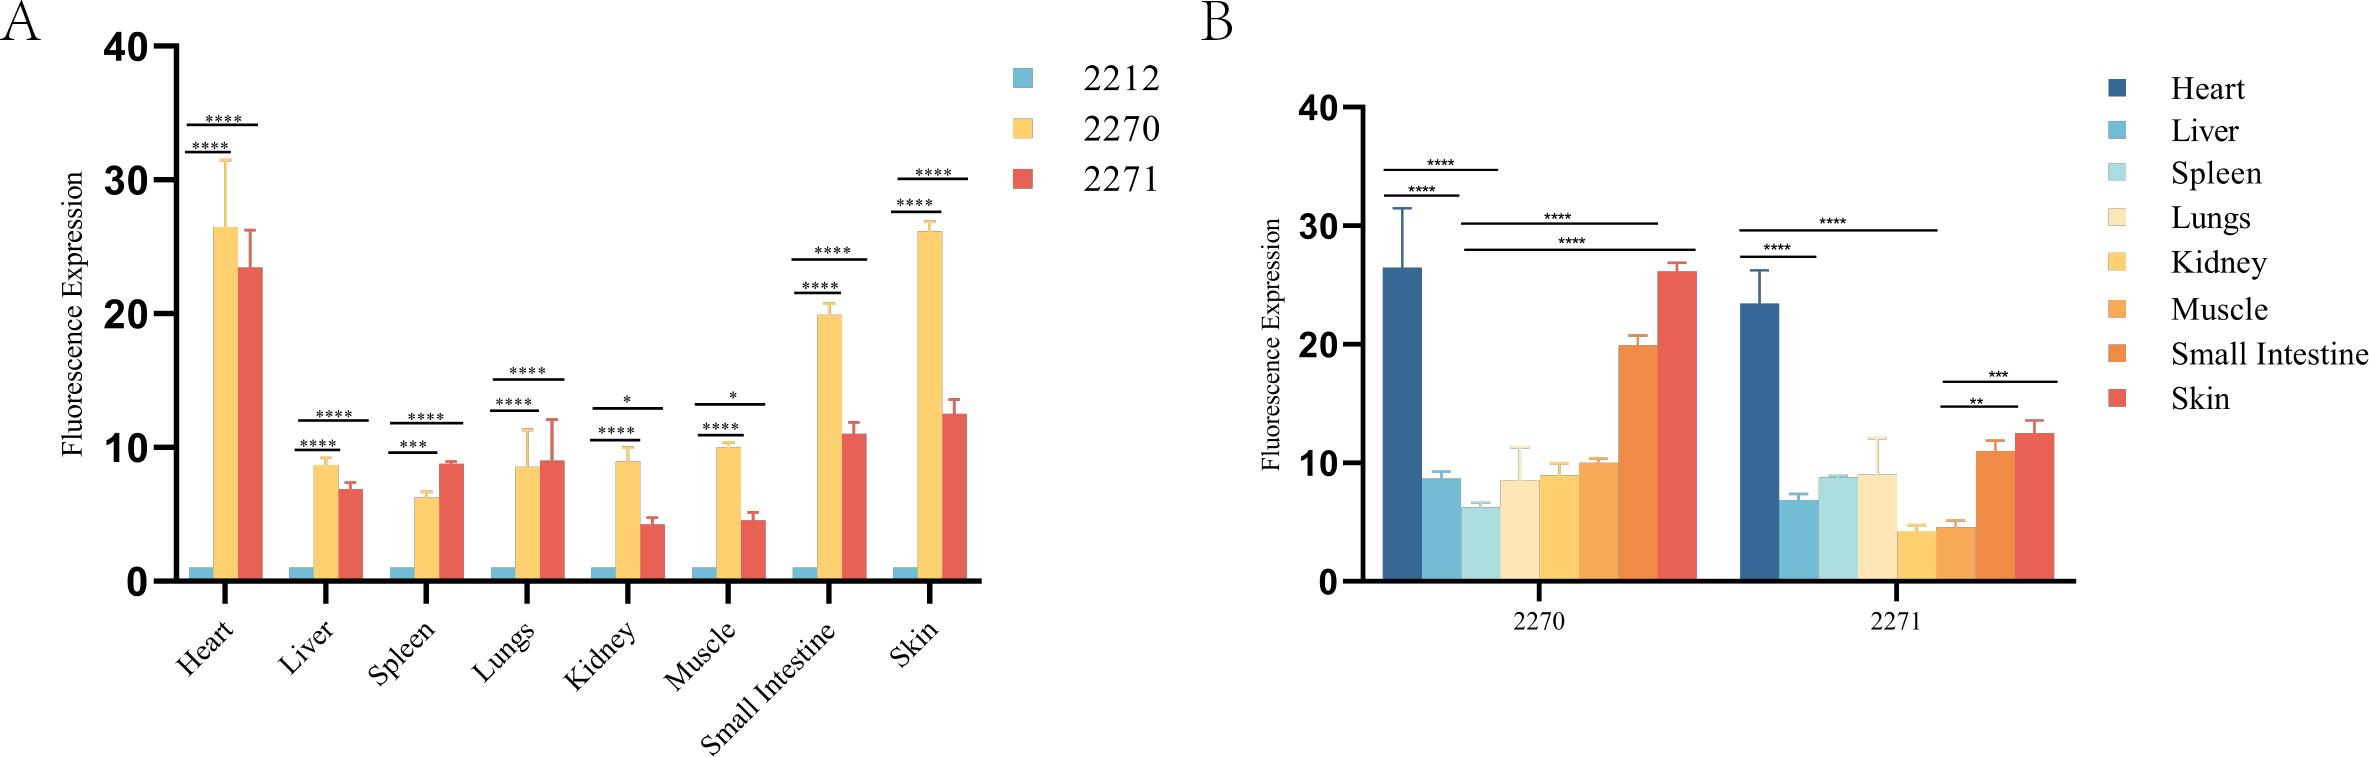


图S3组织特异性荧光表达模式：跨样本横向对比与单样本纵向分析

（图注说明：荧光强度数据已以第一行样本为基准进行归一化处理）

A.样本2212、2270与2271跨个体组织荧光强度对比分析（横向比较不同样本间相同组织的荧光表达差异），误差线代表平均值±SD。* *p* < 0.05；** *p* < 0.01；

B.样本2270与2271的组织内荧光表达异质性（纵向分析单一样本中不同组织的特异性分布），误差线代表平均值±SD。* *p* < 0.05；** *p* < 0.01。
